# Supplementary material for: Plasmon-mediated chemical transformation from alkane to alkene on a silver nanoparticle array under 532 nm excitation
Source: Royal Society of Chemistry journal article supplement (doi:10.1039/c9cp00129h), 2019-01-01
Supplement: c9cp00129h1.pdf [file c9cp00129h1.pdf]

## Electric Supplementary Information

# Plasmon-Mediated Chemical Transformation from Alkane to Alkene on Silver Nanoparticle Array under 532 nm Excitation

Yuki Takeuchi, Tetsuya Fujita, Nobuyuki Takeyasu\*

Graduate School of Natural Science and Technology, Okayama University, 3-1-1, Tsushima-naka, Kita-ku, Okayama, 700-8530 Japan

\*To whom correspondence should be addressed: [takeyasu@okayama-u.ac.jp](mailto:takeyasu@okayama-u.ac.jp)

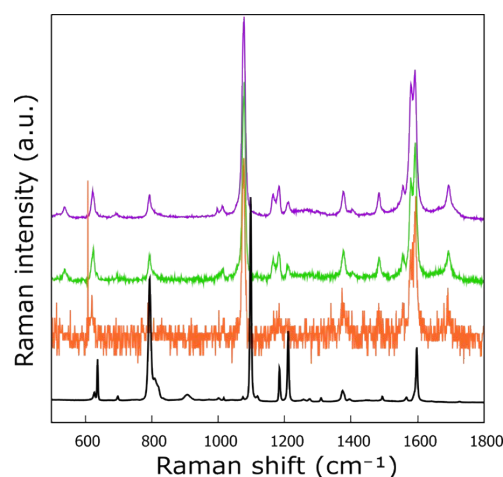

SFigure 1. Normal Raman (black) and SERS spectra of *p*-MT measured at different position at the laser intensities of 4 (orange), 40 (green) and 400 (purple) W/mm<sup>2</sup> in the sample observed in Fig. 2. Ethanol was dried, and the measurements were performed under atmospheric condition. The Raman peaks from Ph-CO and CO were similarly observed.

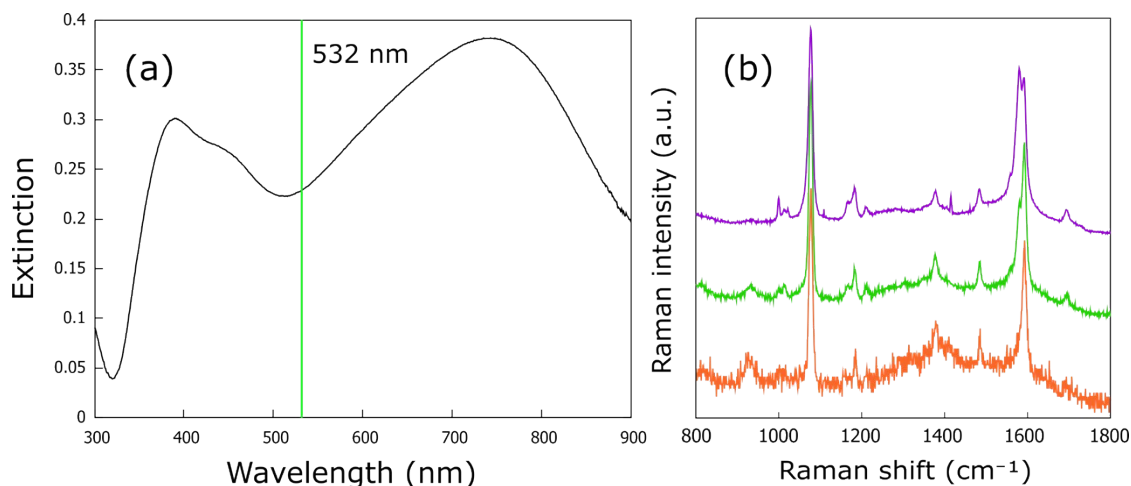

SFigure 2. (a) Extinction spectrum of AgNP array used for “off-resonant” SERS measurement. The extinction peak was around 750 nm. (b) SERS spectrum of *p*-MT measured under “off-resonant” condition. 532 nm excitation was illuminated on *p*-MT on the AgNP array shown in SFig. 2(a). The laser intensities were 4 (orange), 40 (green) and 400 (purple) W/mm<sup>2</sup>. The chemical transformation was not clearly observed at 4 W/mm<sup>2</sup> although the peaks were observed at 1580 and 1690 cm<sup>-1</sup> at the same intensity in SFig. 1. This is due to the less coupling efficiency as plasmons in the case of “off-resonant” condition.

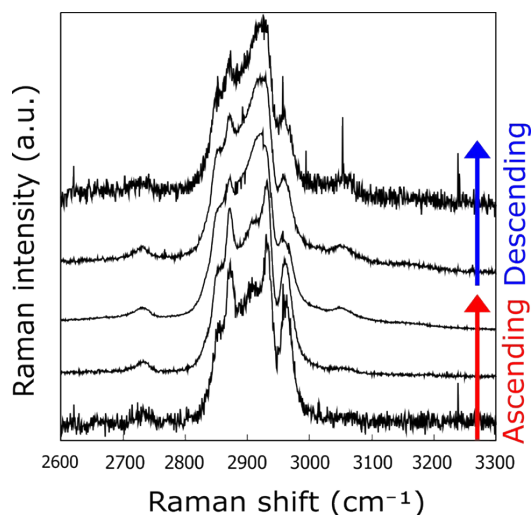

SFigure 3. SERS spectra (2600-3300 cm<sup>-1</sup>) of 1-BT measured at ascending the laser intensity of 4, 40 and 400 W/mm<sup>2</sup>, afterwards, descending the laser intensity of 40 and 4 W/mm<sup>2</sup>. The measuring time was 150 s, and the cumulated number is 2.

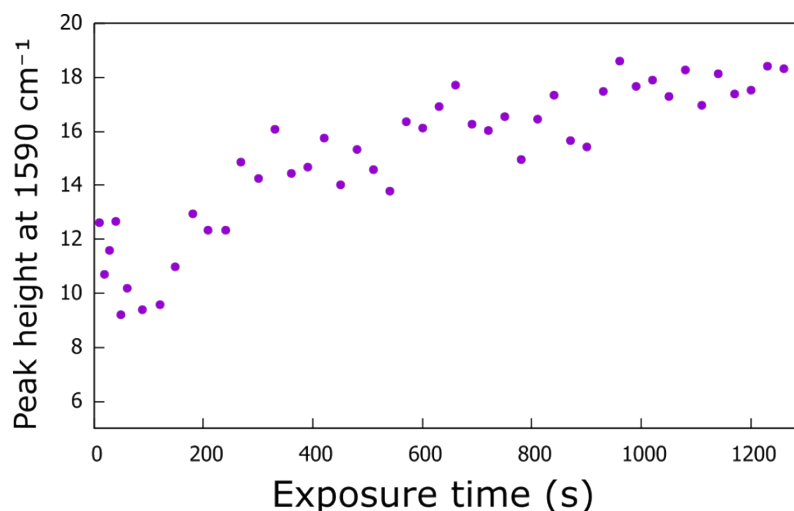

SFigure 4. Growth of Raman peak at 1590 cm<sup>-1</sup> with exposure time. The laser intensity was 185 W/mm<sup>2</sup>. Each measuring time was 10 s until 60 s and 30 s from 60 s to 1260 s.
