# Supplementary figures and images for: Plasmon-mediated chemical transformation from alkane to alkene on a silver nanoparticle array under 532 nm excitation
Source: Royal Society of Chemistry journal article supplement (doi:10.1039/c9cp00129h), 2019-01-01

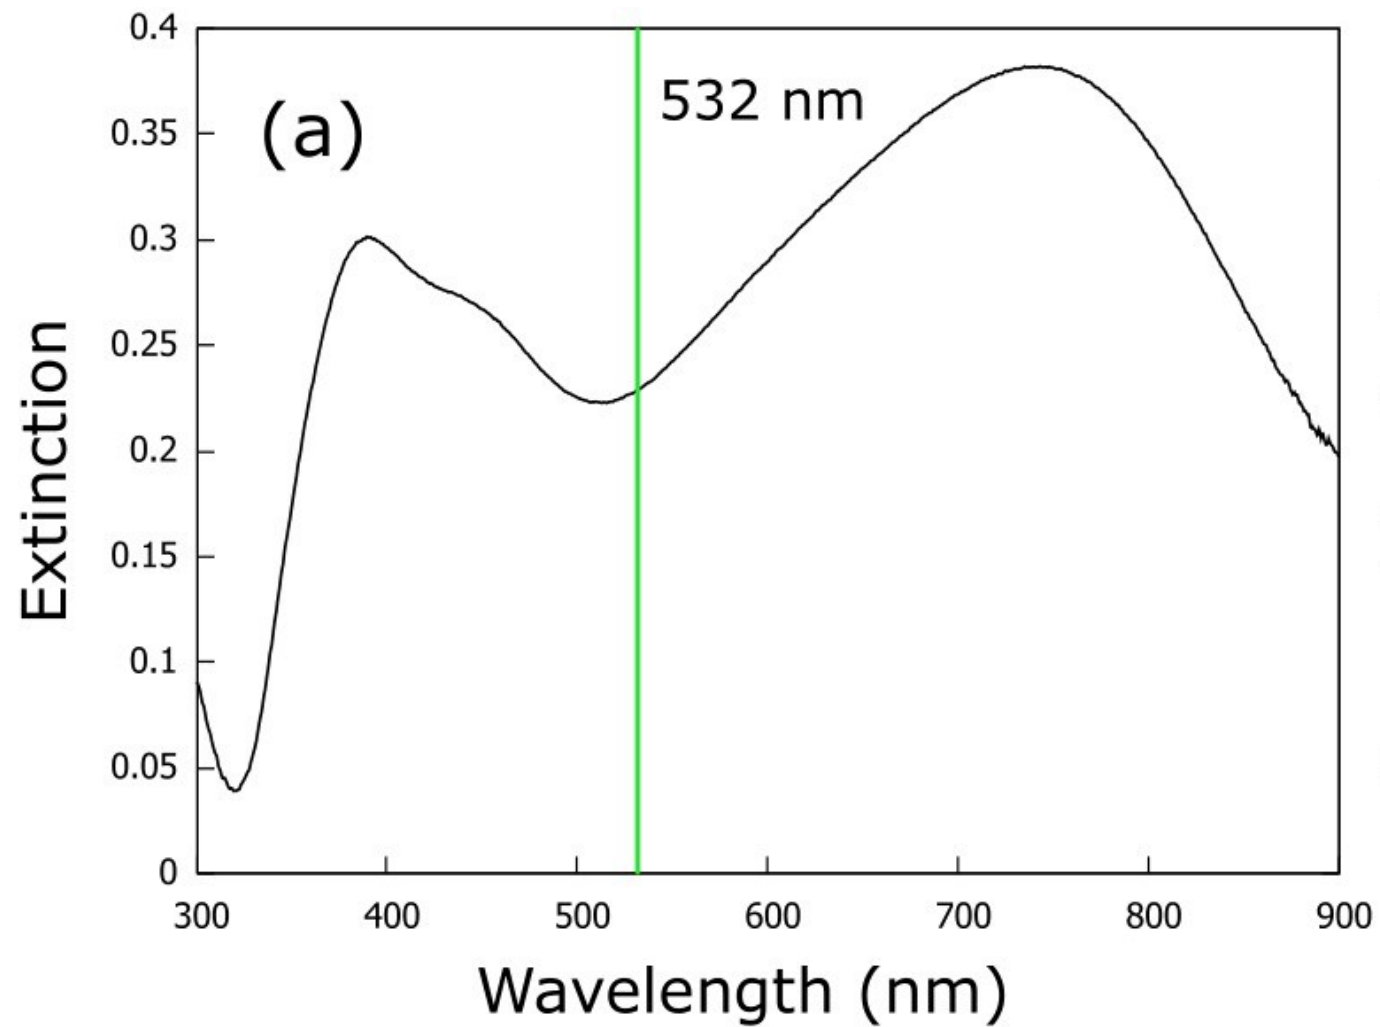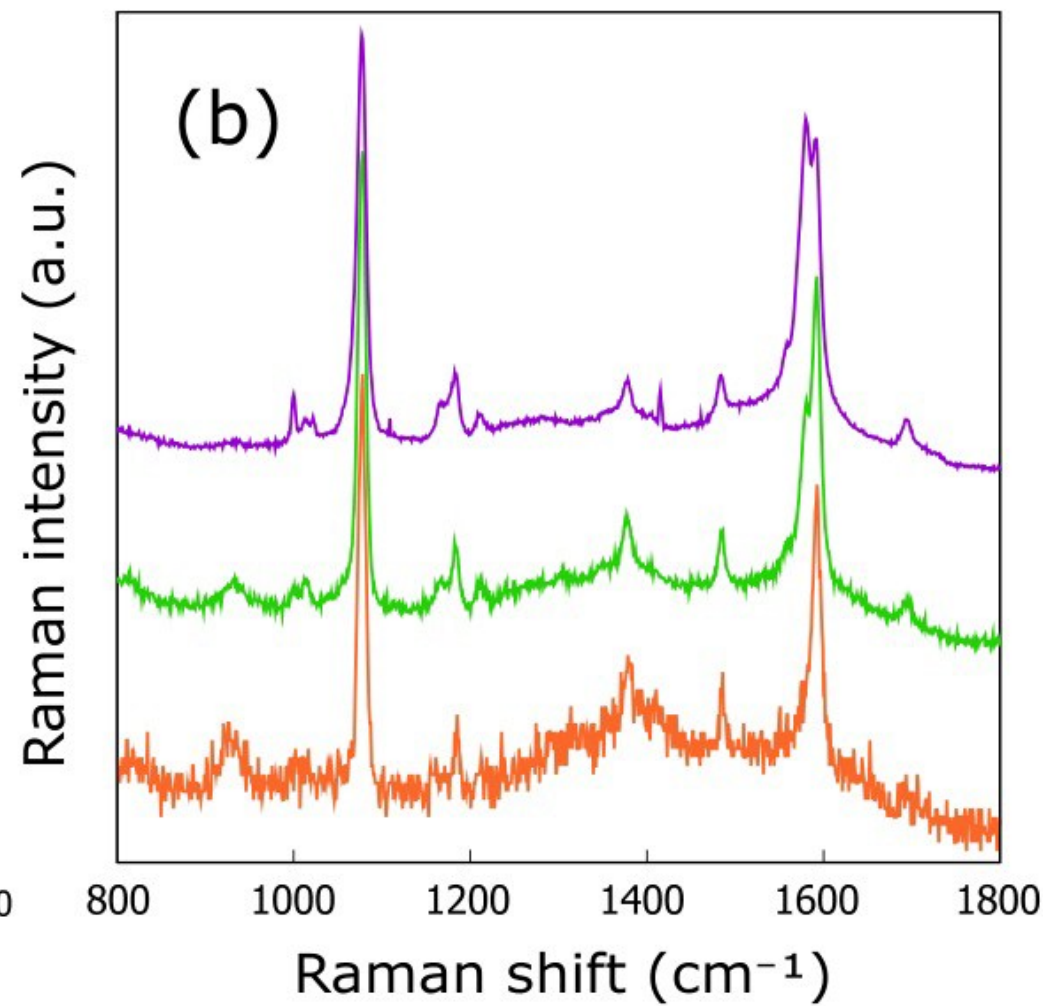

Supplement: c9cp00129h4.pdf [file c9cp00129h4.pdf]

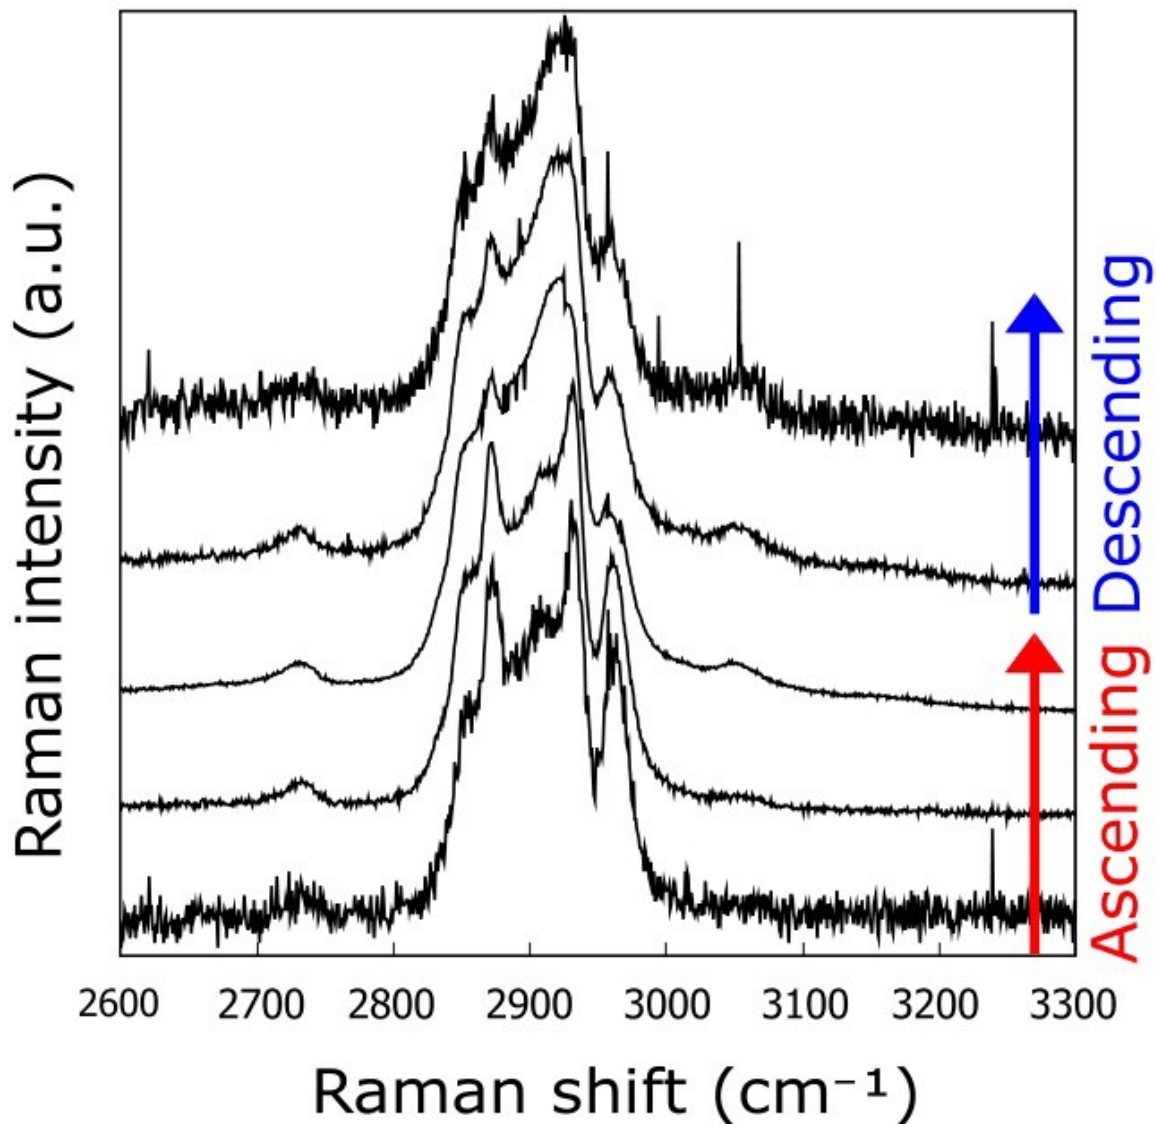

Supplement: c9cp00129h5.pdf [file c9cp00129h5.pdf]

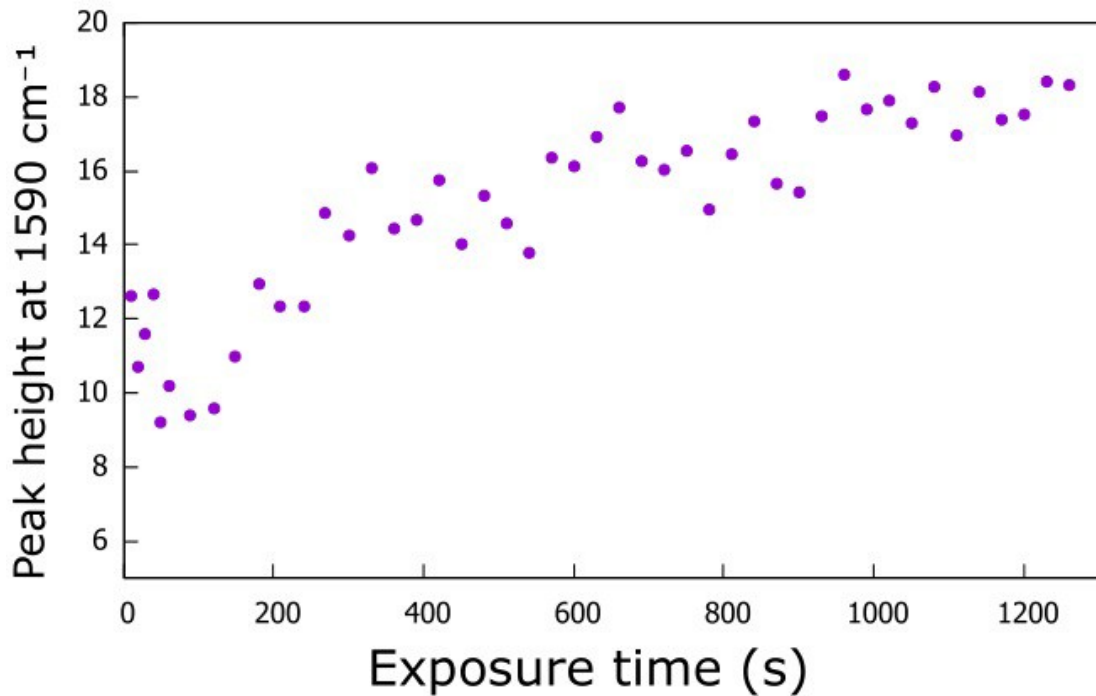

Supplement: c9cp00129h6.pdf [file c9cp00129h6.pdf]
